# Supplementary material
Source: PubMed Central journal article supplement (PMC6451733)
Supplement: mmc1.pdf [file mmc1.pdf]

**Supplemental Data**

**Recurrent Germline *DLST* Mutations in Individuals  
with Multiple Pheochromocytomas and Paragangliomas**

**Laura Remacha, David Pirman, Christopher E. Mahoney, Javier Coloma, Bruna Calsina, Maria Currás-Freixes, Rocío Letón, Rafael Torres-Pérez, Susan Richter, Guillermo Pita, Belén Herráez, Giovanni Cianchetta, Emiliano Honrado, Lorena Maestre, Miguel Urioste, Javier Aller, Óscar García-Uriarte, María Ángeles Gálvez, Raúl M. Luque, Marcos Lahera, Cristina Moreno-Rengel, Graeme Eisenhofer, Cristina Montero-Conde, Cristina Rodríguez-Antona, Óscar Llorca, Gromoslaw A. Smolen, Mercedes Robledo, and Alberto Cascón**

Figure S1

**A**

| Mutation    | neutral    |      | deleterious |            | % expected accuracy |      |      |
|-------------|------------|------|-------------|------------|---------------------|------|------|
|             | PredictSNP | MAPP | PhD-SNP     | PolyPhen-1 | PolyPhen-2          | SIFT | SNAP |
| p.Arg231Asn | 87%        | 72%  | 59%         | 74%        | 81%                 | 79%  | 81%  |
| p.Asp304Asn | 75%        | 78%  | 68%         | 67%        | 41%                 | 90%  | 77%  |
| p.Gly374Glu | 87%        | 91%  | 68%         | 74%        | 81%                 | 79%  | 89%  |
| p.Tyr422Cys | 72%        | 74%  | 61%         | 74%        | 81%                 | 79%  | 89%  |

**B**

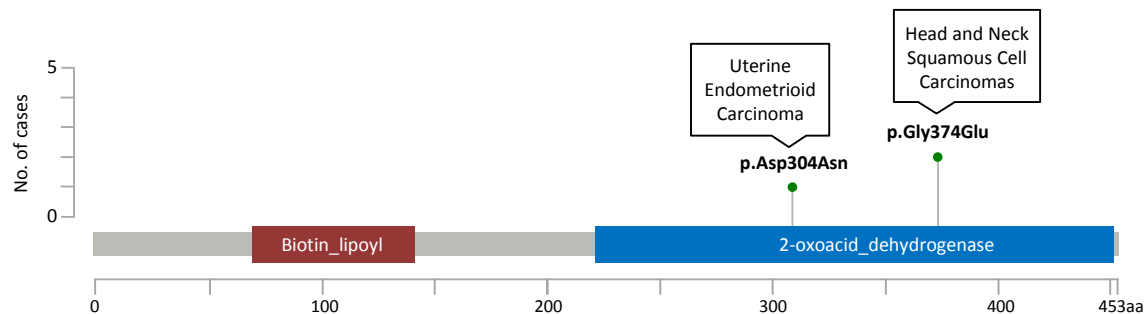

**Figure S1. (A)** Prediction of the effects of the different DLST substitutions by seven consensus classifiers using PredictSNP. **(B)** Previously reported DLST variants found in endometrioid carcinoma (p.Asp304Asn) and upper aerodigestive tract squamous cell carcinoma (p.Gly374Glu). Data are from cBioPortal. The number of cases of each variant is represented by vertical bars.

Figure S2

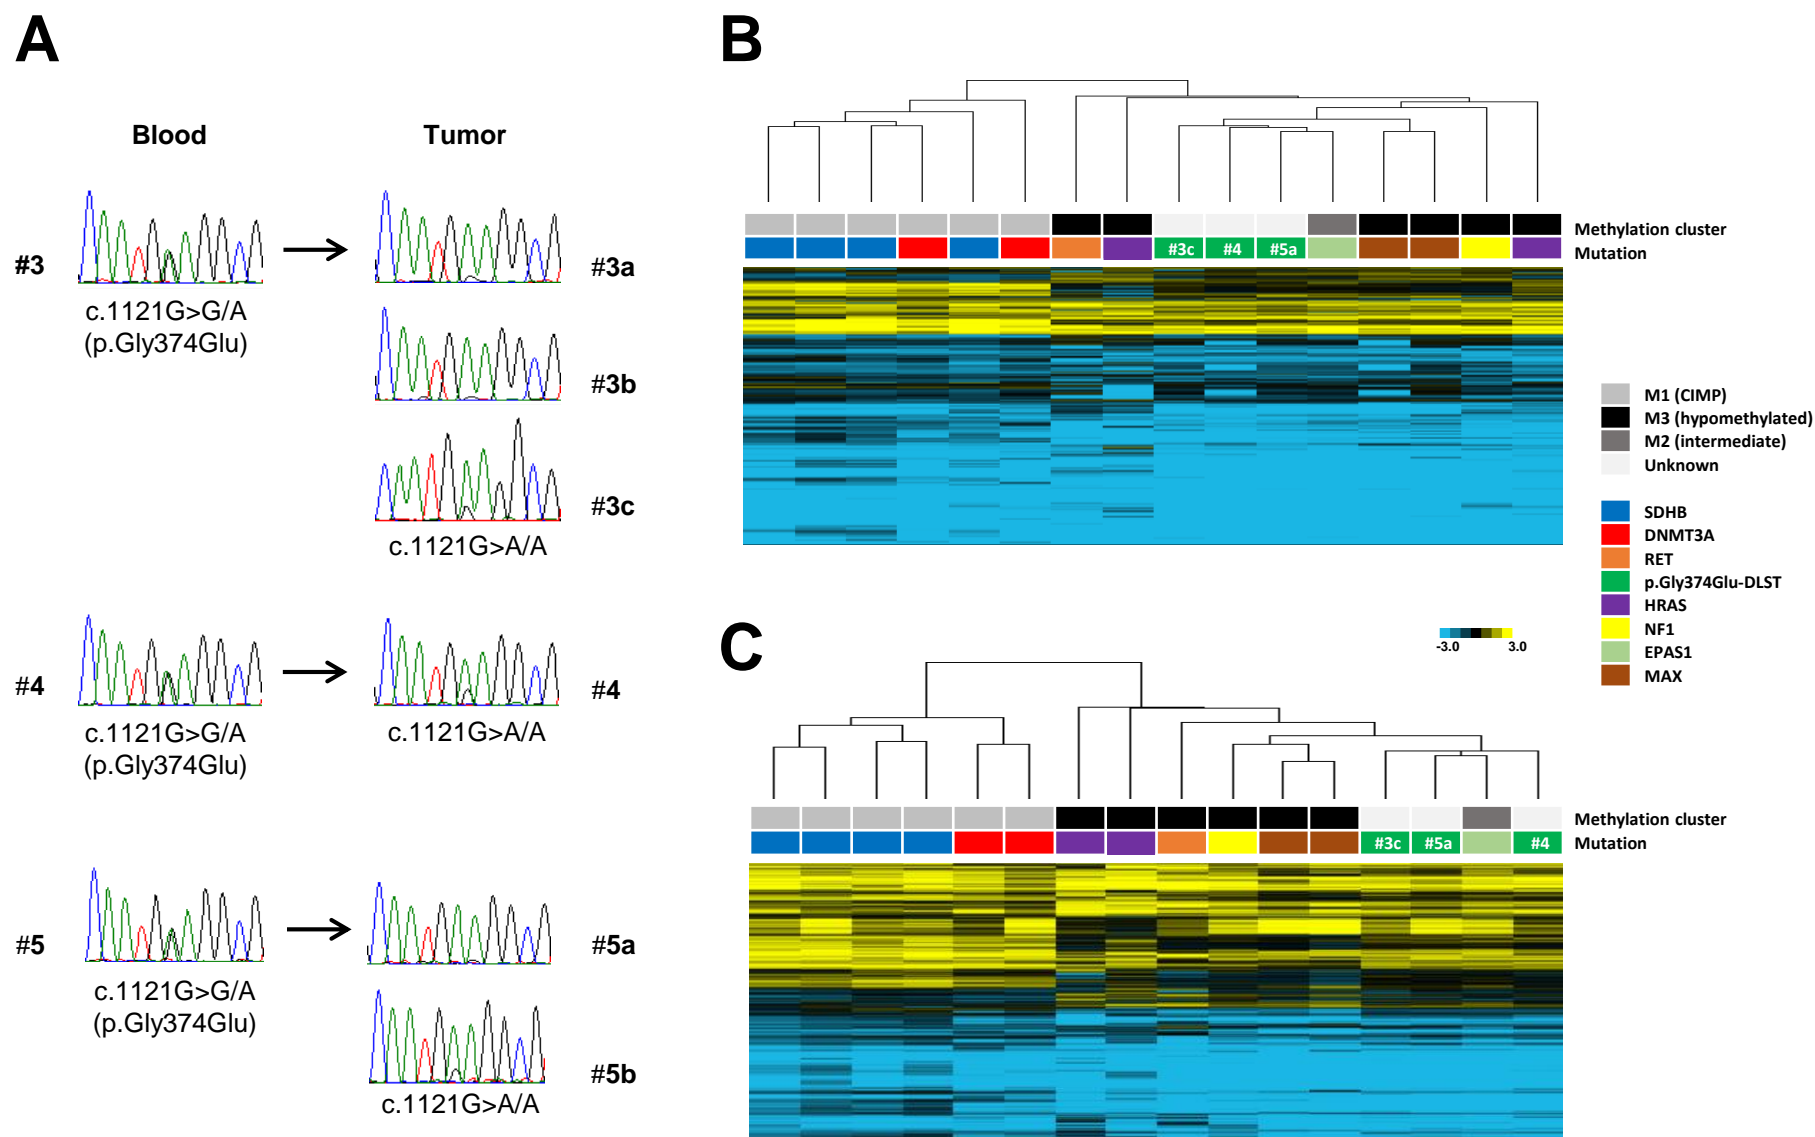

**Figure S2. (A)** Sanger sequencing of six tumors from three unrelated individuals (p.Gly374Glu) showing LOH of the wild-type *DLST* allele. **(B)** Hierarchical clustering of methylation data from p.Gly374Glu-*DLST* tumors (n=3; #3c, #4, #5a) compared to controls (n=13; 2 *DNMT3A*, 4 *SDHB*, 1 *EPAS1*, 2 *MAX*, 2 *HRAS*, 1 *RET* and 1 *NF1*-mutated tumors). Tumors (denoted with different colors depending on the gene mutated) were split up between different methylation clusters of PPGLs<sup>30</sup>: cluster M1 (denoted in light grey) which included *SDHB*- (n=4) and *DNMT3A*- (n=2) mutated tumors, cluster M2 (denoted in dark grey) which included one *EPAS1*-mutated tumor, and cluster M3 (denoted in black) which included *RET*- (n=1), *HRAS*- (n=2), *NF1*- (n=1), and *MAX*- (n=2) mutated PPGLs. City Block (SD=1.4) and complete linkage characteristics were used for the analysis. **(C)** Hierarchical clustering of the 16 mutated tumors from panel (B) based on methylation data for 125,112 probes corresponding to 4,662 genes with CpG sites reported as significantly hypermethylated in M1 (*SDHx*-mutated) PPGLs. The three tumors carrying the p.Gly374Glu-*DLST* variant (#3c, #4 and #5a), were clustered together and separated from cluster M1 samples. Uncentered correlation (SD=1.5) and complete linkage characteristics were used for the analysis.

Figure S3

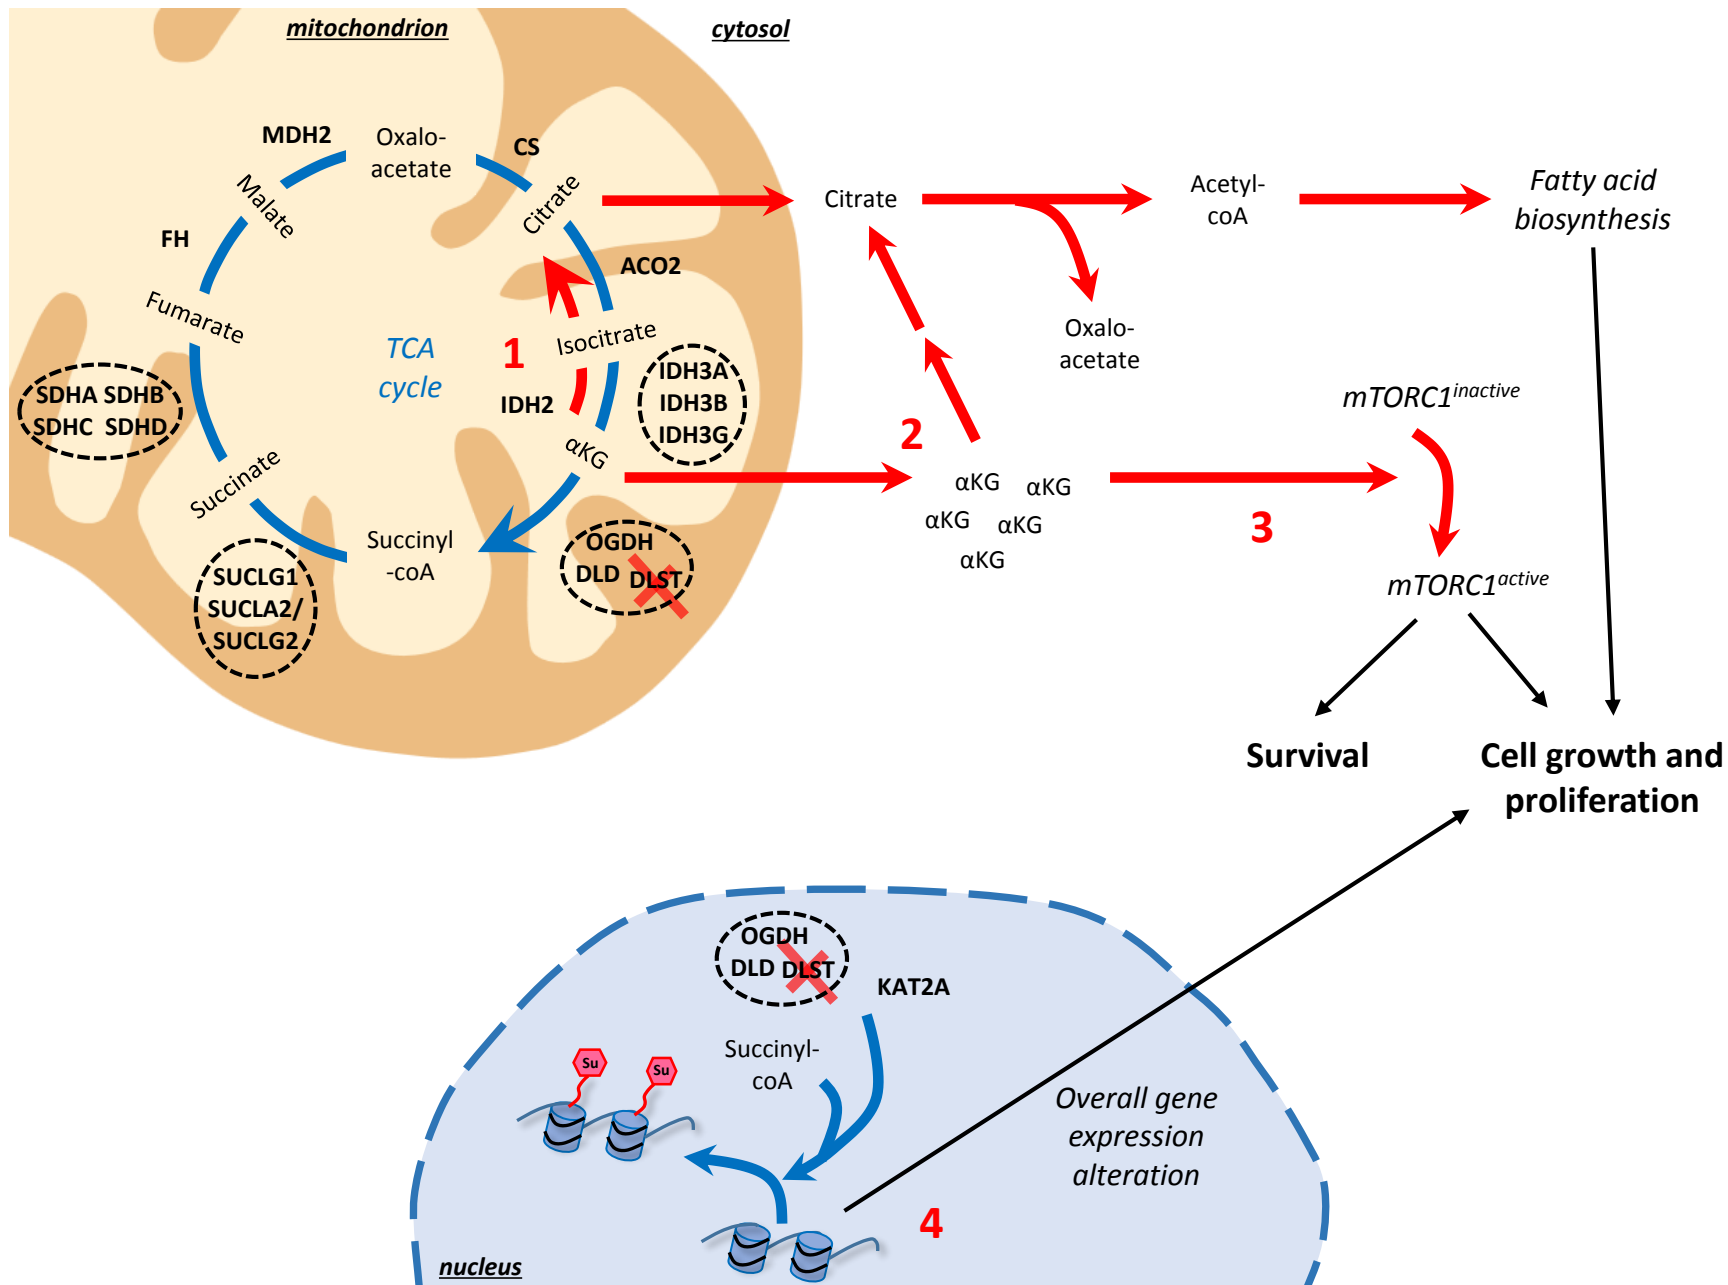

**Figure S3.** Schematic representation of theoretical extra-mitochondrial consequences due to  $\alpha$ KG accumulation upon inactivation of OGDH-complex DLST subunit (denoted by a red cross). 1) Loss of activity of the OGDH complex and the unbalance of the  $\alpha$ KG/citrate ratio can lead to a TCA cycle functioning in a reverse mode, ultimately supporting *de novo* fatty acid synthesis and favoring tumor growth. 2) In addition, perturbations of the  $\alpha$ KG pool affect the cytoplasmic level of acetyl-CoA by its conversion to citrate, increasing fatty acid biosynthesis. 3) High cytosolic levels of  $\alpha$ KG may also promote aberrant mammalian target of rapamycin complex 1 (mTORC1) activation, which might be beneficial for cancer cells by promoting survival and proliferation. 4) Finally, the OGDH complex, associated with KAT2A in gene promoter regions, plays an instrumental role in the regulation of gene expression by histone succinylation. Therefore, loss of OGDH activity by *DLST* mutation may lead to altered overall gene expression and tumor cell proliferation. Blue arrows denote the cellular processes in which the wild-type OGDH complex is involved, and red arrows indicate alternative pathways activated upon loss of OGDH activity.

Figure S4

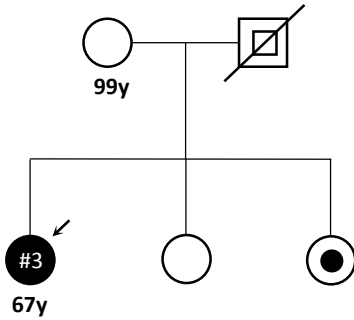

- #3 PGL para-aortic (27y) + PGL renal and PGL pelvic (35y) + PGL pre-sacrum (41y) + PGL Zuckerkandl (49y) + PGL para-aortic and PGL iliac (53y, operated with 66y) + uterine endometrioid carcinoma (66y) - p.Gly374Glu

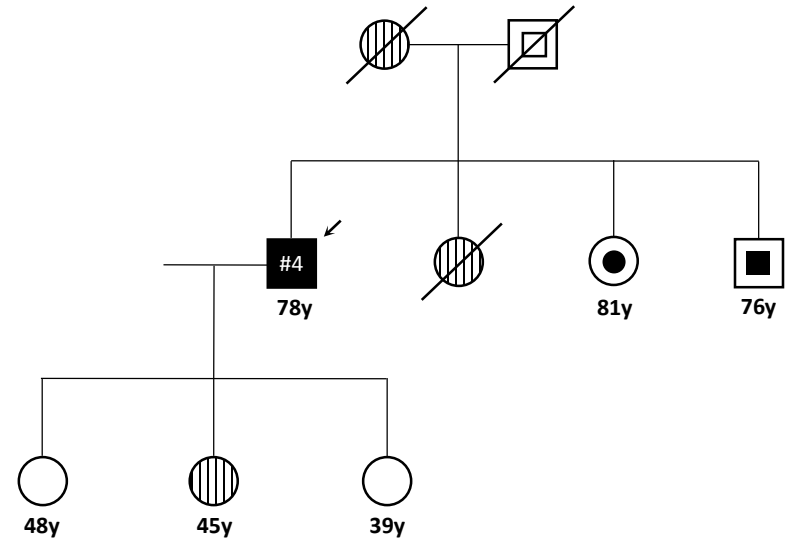

- #4 PGL para-adrenal (38y) + PGL para-aortic (62y) + PGL para-vertebral (69y) - p.Gly374Glu

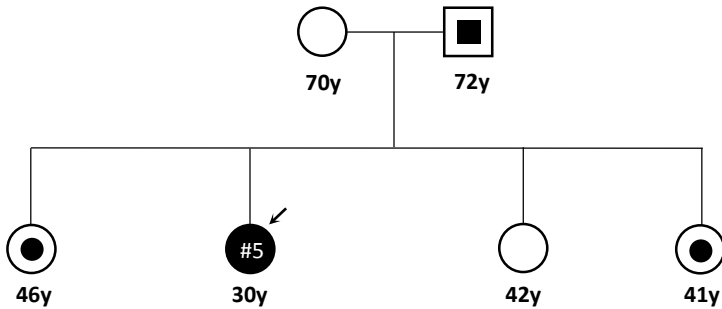

- #5 PGL para-adrenal + PGL retroperitoneal (24y) + PGL para-adrenal vs recidivation (29y) - p.Gly374Glu

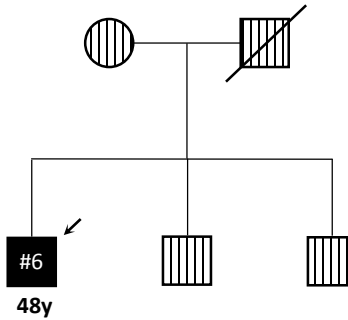

- #6 PGL pre-sacrum + two PGLs para-aortic + PGL renal (29y) - p.Gly374Glu

**Figure S4.** Pedigrees of individuals #3, #4, #5 and #6. The proband of each pedigree is indicated by a black arrowhead; striped symbols indicate individuals in which no genetic test was performed; internal filled symbols indicate asymptomatic (no clinical surveillance performed) individuals carrying the p.Gly374Glu variant; internal empty symbols indicate individuals predicted to carry the p.Gly374Glu variant.

**Table S1.** Clinical data of the PPGL patients included in the study

| <i>Number of cases</i> | <i>Gender</i>                               | <i>Median age at onset (range)</i> | <i>Patients with single (S) or multiple (M) tumors</i> | <i>Location of tumors</i>                                                           | <i>Catecholamine phenotype</i>                                       | <i>Metastatic cases</i> |
|------------------------|---------------------------------------------|------------------------------------|--------------------------------------------------------|-------------------------------------------------------------------------------------|----------------------------------------------------------------------|-------------------------|
| <b>104</b>             | m: <b>43</b><br>f: <b>59</b><br>U: <b>2</b> | <b>49y</b><br>(8-82)               | S: <b>77</b><br>M: <b>27</b>                           | PCC: <b>57</b><br>TAP: <b>22</b><br>H&N: <b>14</b><br>Misc: <b>9</b><br>U: <b>2</b> | NORA: <b>34</b><br>ADR: <b>17</b><br>NF: <b>14</b><br>DOPA: <b>8</b> | <b>11</b>               |

m: male; f: female; U: unknown; PCC: pheochromocytoma; TAP: thoracic-abdominal-pelvic paraganglioma; H&N: head and neck paraganglioma; Misc: miscellaneous; NORA: noradrenergic; ADR: adrenergic; NF= non functional, DOPA: dopaminergic

**Table S2.** Genes included in the targeted next-generation sequencing panel

*ACO1*

*ACO2*

*CS*

*DLAT*

*DLD*

*DLST*

*GOT1*

*GOT2*

*IDH1*

*IDH2*

*IDH3A*

*IDH3B*

*IDH3G*

*MDH1*

*OGDH*

*OGDHL*

*PC*

*PCK1*

*PCK2*

*PDHA1*

*PDHA2*

*PDHB*

*SLC25A1*

*SLC25A10*

*SLC25A11*

*SLC25A13*

*SUCLA2*

*SUCLG1*

*SUCLG2*

*FH*

*MDH2*

*SDHA*

*SDHB*

*SDHC*

*SDHD*

*SDHAF1*

*SDHAF2*

**Table S3.** Targeted NGS variants identified

| Gene symbol                              | Description                                     | Nucleotide variant | Chr | Coordinate | Consequence           | SIFT        | PolyPhen          | cDNA variant | Protein variant | GnomAD (carriers:total individuals) |
|------------------------------------------|-------------------------------------------------|--------------------|-----|------------|-----------------------|-------------|-------------------|--------------|-----------------|-------------------------------------|
| <i>DLST</i><br>GenBank:<br>NM_001933     | Dihydrolipoamide S-Succinyltransferase          | G>G/A              | 14  | 75361034   | Missense variant      | deleterious | probably_damaging | c.692G>A     | p.Arg231Gln     | 2:123,099                           |
|                                          |                                                 | G>G/A              | 14  | 75366634   | Missense variant      | tolerated   | probably_damaging | c.910G>A     | p.Asp304Asn     | -                                   |
|                                          |                                                 | G>A/A              | 14  | 75367830   | Missense variant      | deleterious | probably_damaging | c.1121G>A    | p.Gly374Glu     | 2:123,121                           |
|                                          |                                                 | A>A/G              | 14  | 75368936   | Missense variant      | deleterious | probably_damaging | c.1265A>G    | p.Tyr422Cys     | 3:137,372                           |
|                                          |                                                 | T>T/A              | 14  | 75367766   | Splice region variant | -           | -                 | c.1060-3T>A  | -               | 1:122,641                           |
| <i>IDH1</i><br>GenBank:<br>NM_001282387  | Isocitrate Dehydrogenase (NADP(+)) 1, Cytosolic | T>T/A              | 2   | 209113206  | Missense variant      | deleterious | probably_damaging | c.301A>T     | p.Asn101Tyr     | 1:123,132                           |
| <i>SLC25A10</i><br>GenBank:<br>NM_012140 | Solute Carrier Family 25 Member 10              | C>C/T              | 17  | 79682747   | Missense variant      | deleterious | probably_damaging | c.353C>T     | p.Thr118Met     | -                                   |
| <i>SLC25A11</i><br>GenBank:<br>NM_003562 | Solute Carrier Family 25 Member 11              | C>C/T              | 17  | 4841465    | Missense variant      | deleterious | probably_damaging | c.721G>A     | p.Asp241Asn     | 1:123,042                           |
| <i>SUCLG1</i><br>GenBank<br>NM_003849    | Succinate-CoA Ligase Alpha Subunit              | G>G/T              | 2   | 84660523   | Missense variant      | deleterious | probably_damaging | c.626C>A     | p.Ala209Glu     | 4:123,001                           |

Chr: chromosome; SIFT: 'Sorting Intolerant From Tolerant' algorithm prediction; PolyPhen: 'Polymorphism Phenotyping' algorithm prediction; GnomAD: frequency of the variant in the gnomAD database
